# Supplementary material
Source: PubMed Central journal article supplement (PMC8454502)
Supplement: NIHMS1692683-supplement-8.pdf [file NIHMS1692683-supplement-8.pdf]

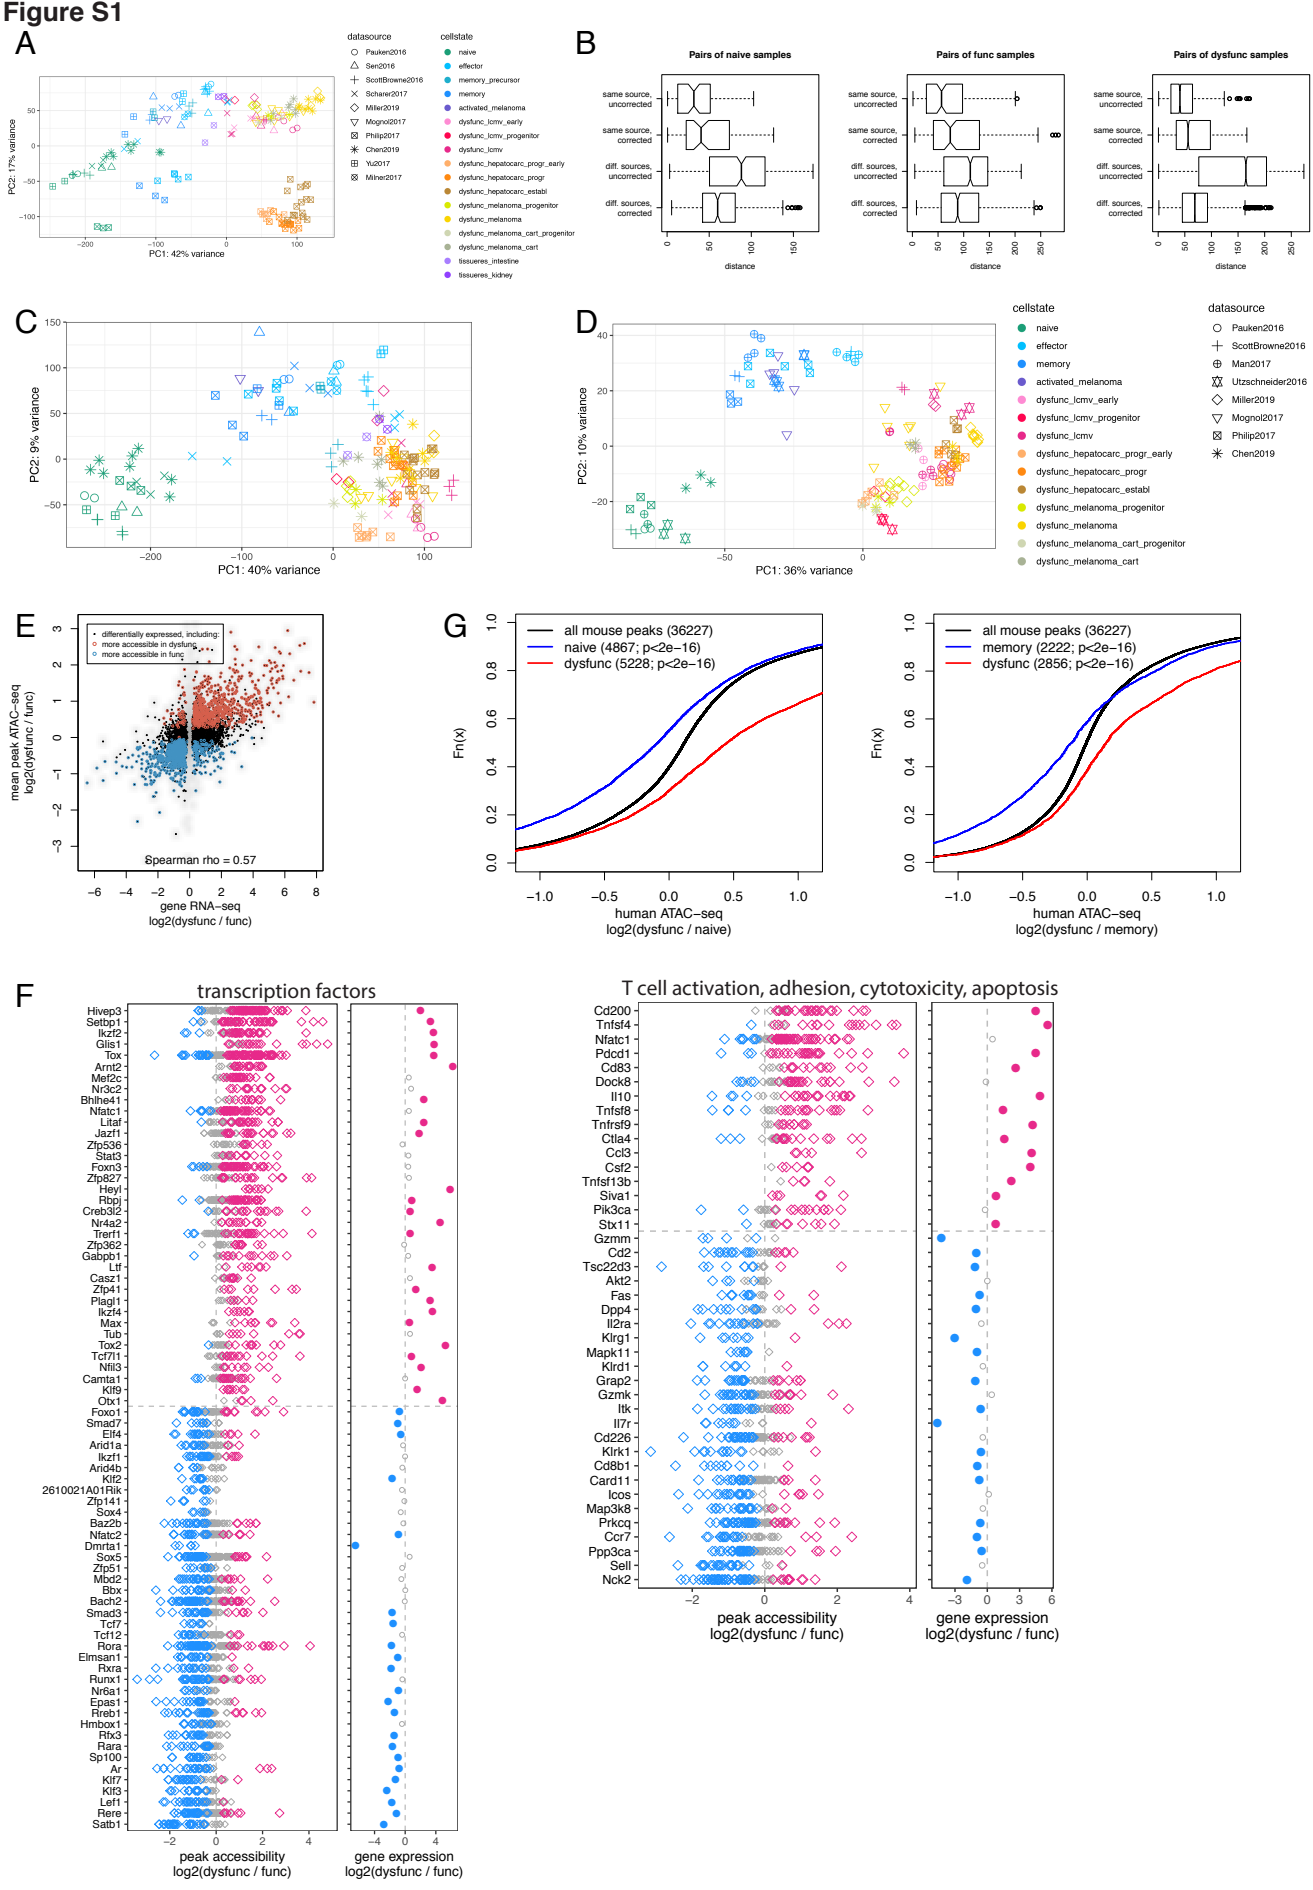

**Figure S1. Universal program of CD8 T cell dysfunction (related to Figure 1).** **A.** Principal component analysis (PCA) of library-size normalized ATAC-seq read counts in 150bp windows around peak summits (functional cell state shown by color, data source by symbol) without batch-effect correction. **B.** Distributions of distances between ATAC-seq vectors of read counts in 150bp windows around peak summits. Distances were calculated in the two-dimensional PCA space built using 20000 most variable peak summit read counts, for pairs of samples in the same functional category (naïve, functional, dysfunctional), separately for pairs of samples from the same study and from different studies, before and after batch effect correction. **C.** PCA of library-size normalized batch-effect corrected ATAC-seq read counts in 150bp windows around peak summits (labels as in **A**) using 10000 most variable peak summit read counts. Here GLM-based batch effect correction used a factor encoding the functional cell state using two values, for naïve cells and all other cells. **D.** PCA of library-size normalized batch-effect corrected RNA-seq read counts for 1000 genes with most variable counts (functional cell state shown by color, data source by symbol). **E.** Scatter plot of differential expression (RNA-seq log<sub>2</sub>FC, x-axis) and differential accessibility (mean ATAC-seq log<sub>2</sub>FC over all peaks associated with a gene, y-axis) between functional and dysfunctional cells (computed as in **D**). Significantly differentially expressed genes shown as black dots. Significantly differentially accessible genes highlighted with red or blue color. **F.** “Diamond” plots of differential accessibility and differential expression between functional and dysfunctional cells for transcription factors and for genes associated with T cell activation, cytotoxicity, adhesion, and apoptosis. In each panel, left: library-size normalized batch-effect corrected ATAC-seq read count log<sub>2</sub>FC for peak summits (diamond shown in color for significantly decreased/increased, FDR < 0.05) of significantly differentially accessible genes; right: log<sub>2</sub> fold change of RNA-seq gene expression for the same genes. **G.** Cumulative distribution function of differential accessibility (ATAC-seq log<sub>2</sub>FC) between naive and dysfunctional (left) or central memory and dysfunctional (right) CD8 T cells in human donors or cancer patients. Shown are peaks evolutionarily conserved when compared with peak summit regions in mice that were significantly more accessible in naïve or memory (blue) or dysfunctional (red) cells; background distribution is for all peaks identified in human cells that were conserved with mouse peak summit regions (black); count and p-value from Kolmogorov-Smirnov test against the background distribution.

**Figure S2****A**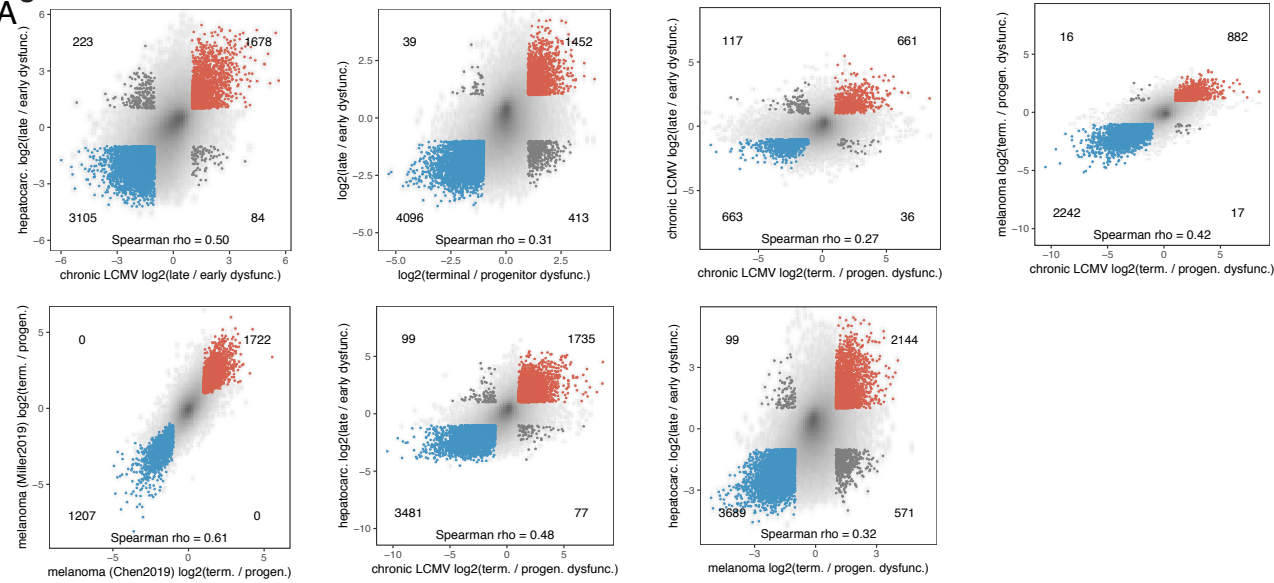**B**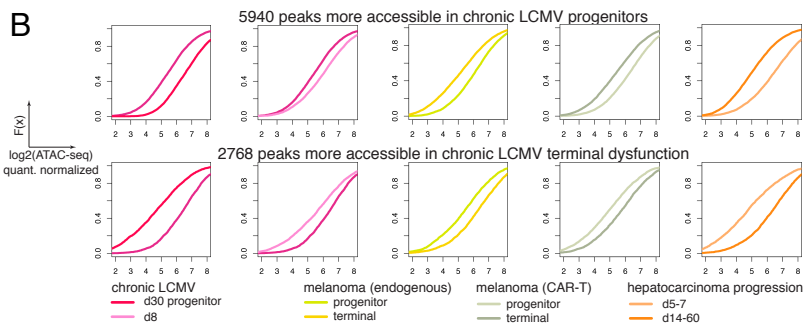**C**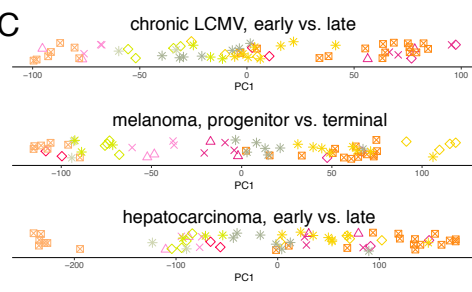**D**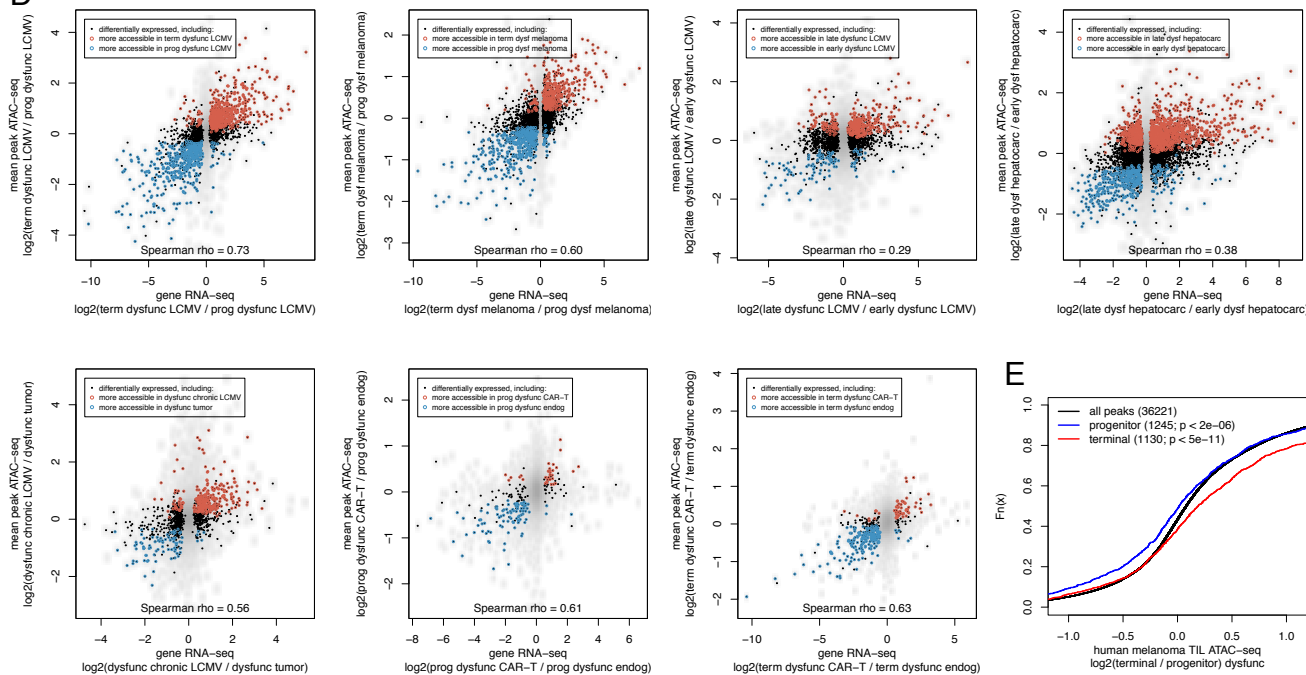**E**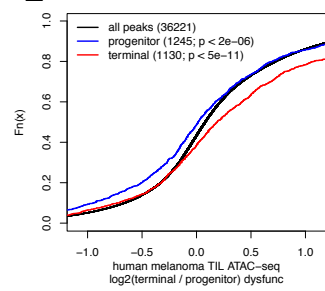

**Figure S2. Progression from early or progenitor to terminal dysfunctional state (related to Figure 1).** **A.** Comparisons of differential accessibility results. Each plot is a scatter plot of log<sub>2</sub>FC of library-size normalized batch-effect corrected ATAC-seq read counts in peak summit regions for two differential accessibility analyses. Color (blue, red, dark gray) is used to highlight quadrants with peak summit regions significantly differentially accessible in both pairwise comparisons. Counts in corners indicate the number of such peak summits in each quadrant. Spearman's correlation is calculated over all such peak summits. **B.** Cumulative distribution function (CDF) of log-transformed quantile-normalized library-size normalized batch-effect corrected ATAC-seq read counts from various studies in 5940 peak summits significantly more accessible in progenitor than terminally dysfunctional T cells and in 2768 peak summits significantly more accessible in terminally than progenitor dysfunctional T cells in chronic LCMV infection (Kolmogorov-Smirnov  $p < 2e-16$  for all comparisons). **C.** First principal component (PC1) of PCA for library-size normalized batch-effect corrected ATAC-seq read counts in dysfunctional T cells from different studies (see Figure 1C). PCA was calculated based on significantly differentially accessible peaks in different pairwise comparisons. For clarity, vertical random jiggle is added. **D.** Scatter plots of differential expression (RNA-seq log<sub>2</sub>FC, x-axis) and differential accessibility (mean ATAC-seq log<sub>2</sub>FC over all peaks associated with a gene, y-axis) between cell states. Significantly differentially expressed genes shown as black dots. Significantly differentially accessible genes highlighted with red or blue color. **E.** Cumulative distribution function of differential accessibility (ATAC-seq log<sub>2</sub>FC) between progenitor (TIM3<sup>-</sup> CD39<sup>-</sup>) and terminally (TIM3<sup>+</sup> CD39<sup>+</sup>) dysfunctional TILs in human tumors. Shown are peaks evolutionarily conserved when compared with peak summit regions in mouse melanoma model that were significantly more accessible in progenitor (blue) or terminally dysfunctional (red) cells; background distribution is for all peaks identified in human cells that were conserved with mouse peak summit regions (black); count and p-value from Kolmogorov-Smirnov test against the background distribution.

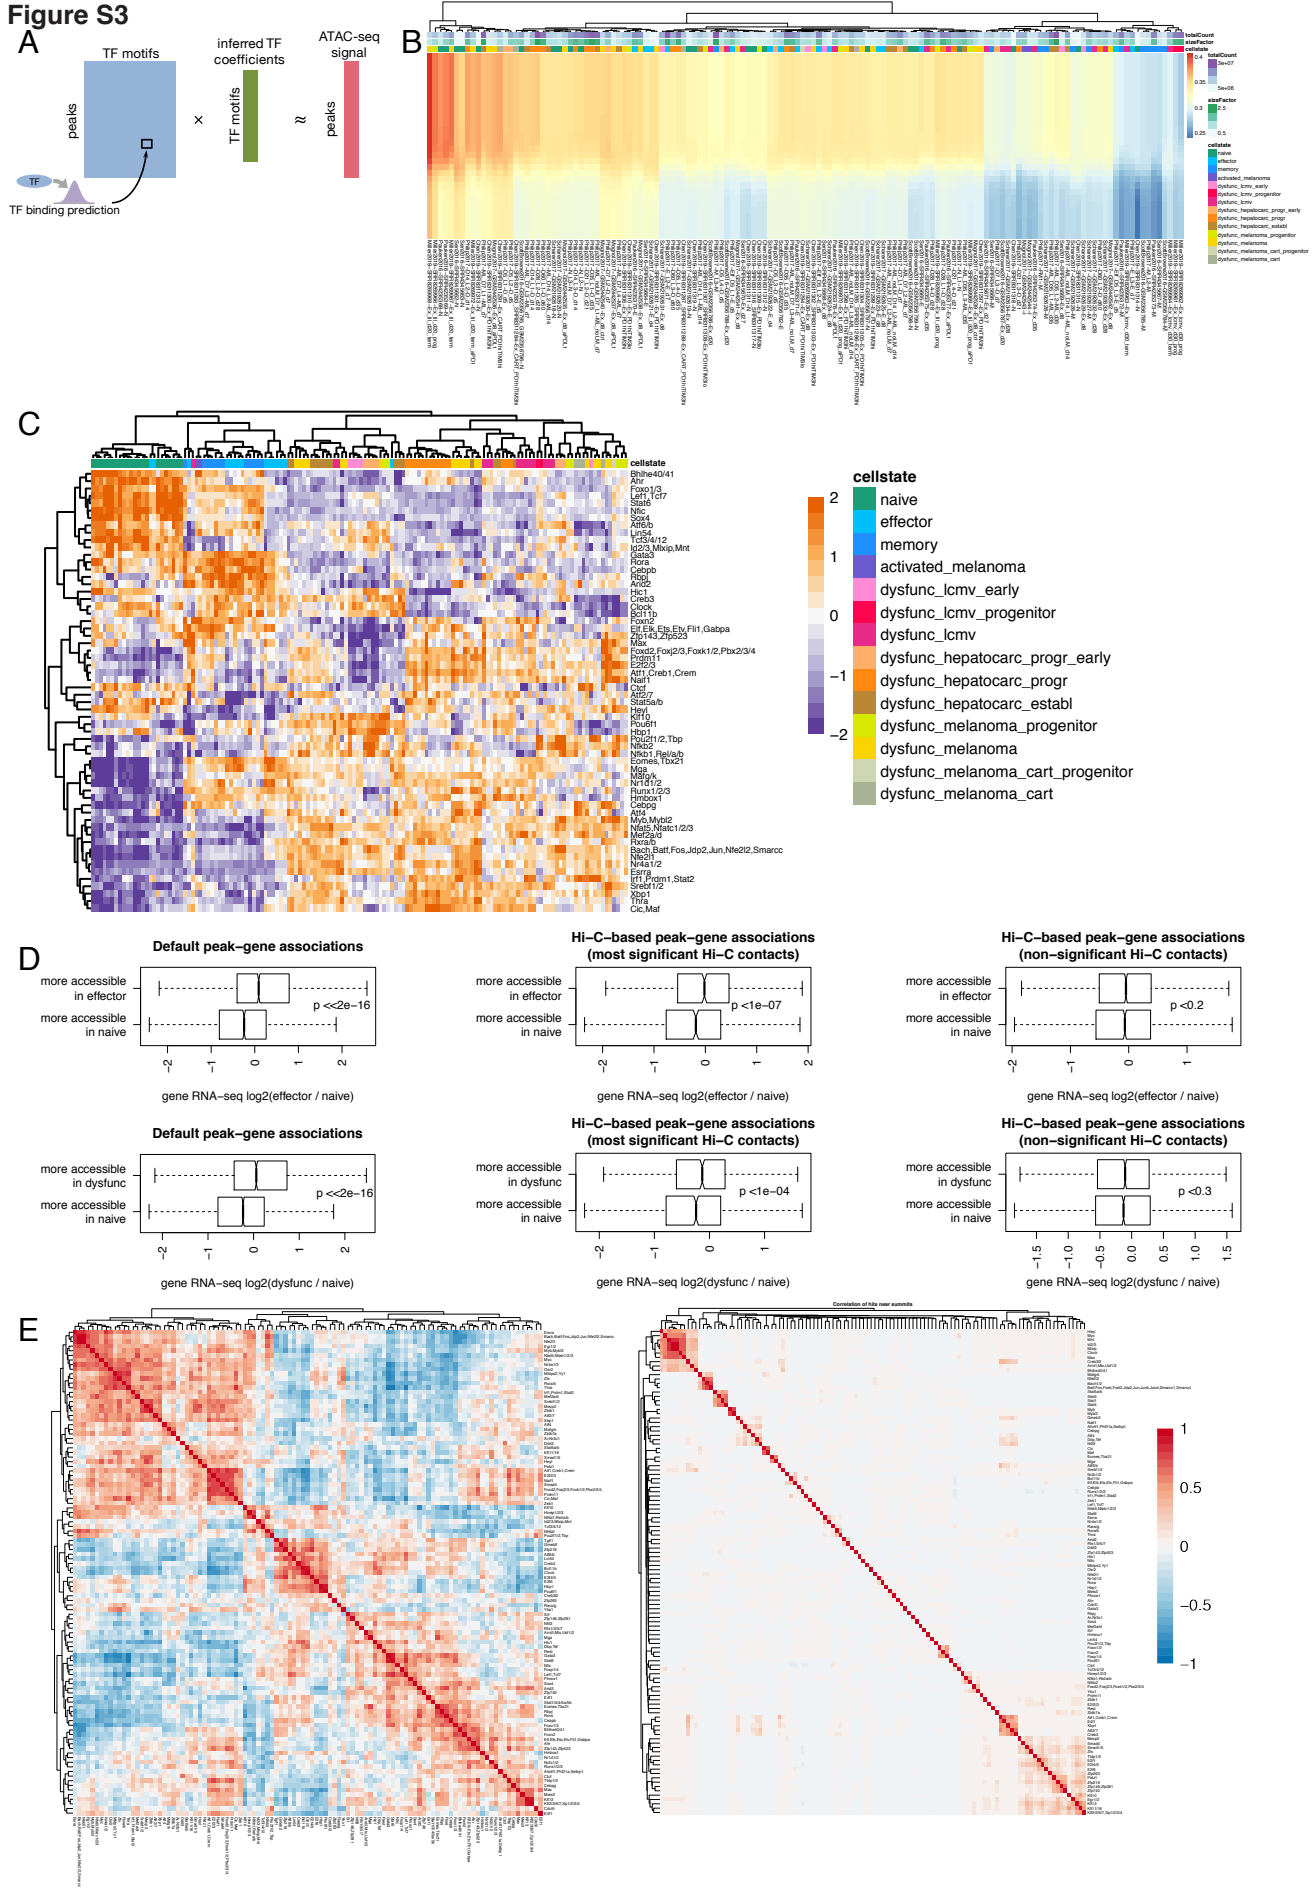

**Figure S3. Predictive models of transcription factor association with chromatin accessibility (related to Figure 2).** **A.** Schematic of the negative binomial generalized linear regression analysis to infer transcription factor (TF) associations with chromatin accessibility. **B.** Spearman correlations between library-size normalized batch-effect corrected ATAC-seq read counts and model predictions for each sample and each value of the regularization parameter. **C.** Inferred TF motif coefficients for regressing library-size normalized batch-effect corrected ATAC-seq read counts in each sample, for motifs corresponding to coefficients with the highest variance across samples, z-score normalized within each row. **D.** Top: Boxplots of log<sub>2</sub>FC of RNA-seq gene expression between naïve and effector cells for genes associated with at least one peak significantly more accessible in naïve than effector cells and associated with at least one peak significantly more accessible in effector than in naïve cells. Left: default peak-gene associations (peak associated to the closest gene in genomic coordinates, if this gene is within 50Kbp). Center: peak-gene associations defined using significant Hi-C contacts in naïve cells. Right: peak-gene associations defined using non-significant Hi-C contacts in naïve cells. Bottom: same analysis for naïve vs. dysfunctional cells. **E.** Spearman correlation of inferred TF motif coefficients across all antigen-experienced samples (left) and of TF motif match scores across the atlas of peak summit regions (right).

**Figure S4**

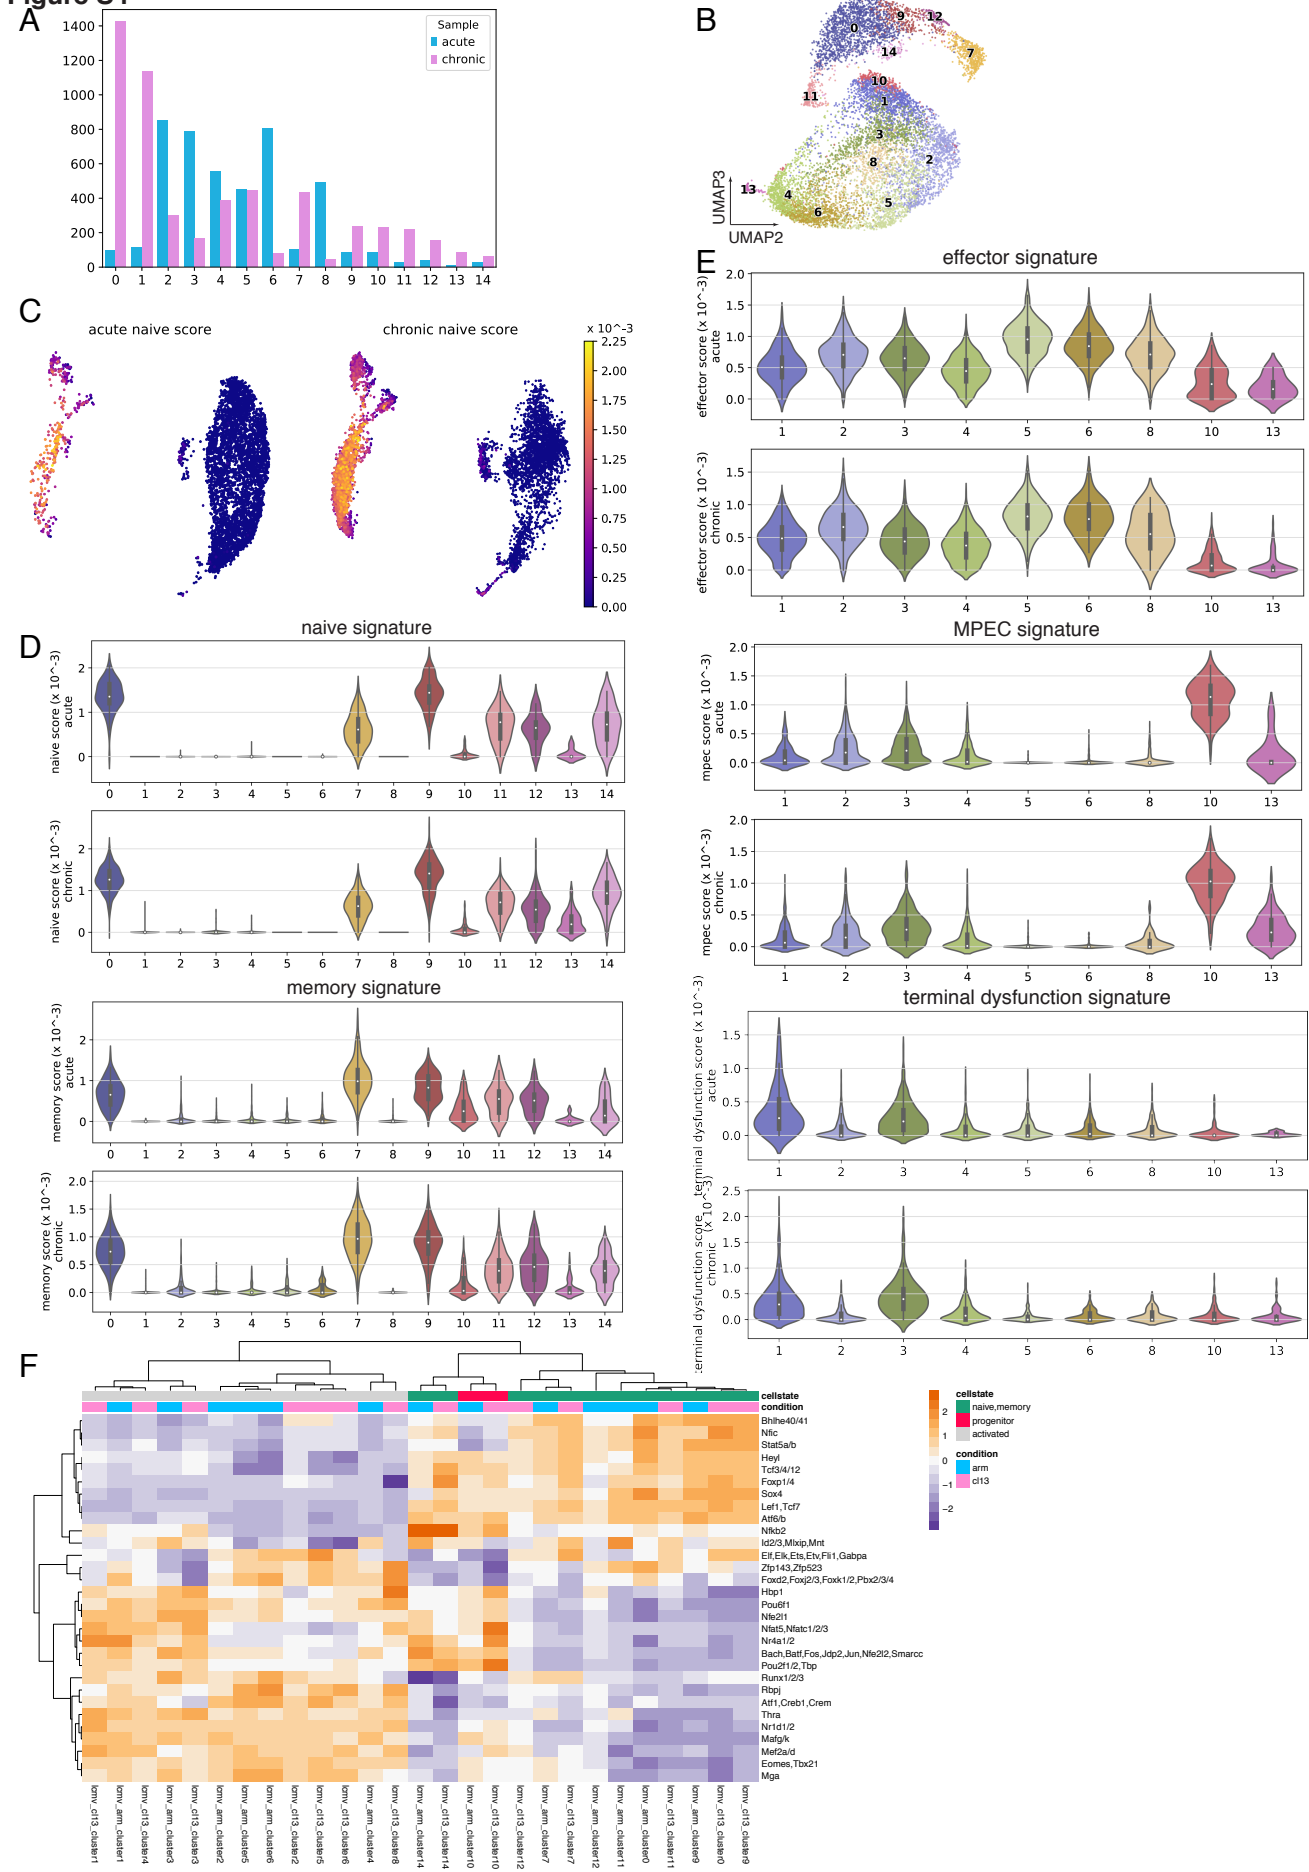

**Figure S4. scATAC-seq analysis of CD8 T cells in acute and chronic infection (related to Figure 3).** **A.** Barplot showing the number of cells in each cluster from each sample. **B.** Components 2 and 3 of the UMAP representation of TF-IDF-transformed scATAC-seq data with Louvain clusters. **C.** Heatmap for single cells in scATAC-seq data, separately for acute and chronic infection, showing the naïve cell signature derived from bulk ATAC-seq data. **D.** Violin plots for scores in scATAC-seq data clusters, separately for acute and chronic infection, of peak signatures (for naïve cells, memory cells) derived from bulk ATAC-seq data. **E.** Violin plots for scores in scATAC-seq data clusters 1-8, 10, 13, separately for acute and chronic infection, of peak signatures (for effector cells, memory precursor cells, terminally dysfunctional cells) derived from bulk ATAC-seq data. **F.** Inferred TF motif coefficients for scATAC-seq counts averaged over cells in each cluster in each of the two samples. Inferred coefficients with the highest variance are shown (z-score row normalized).



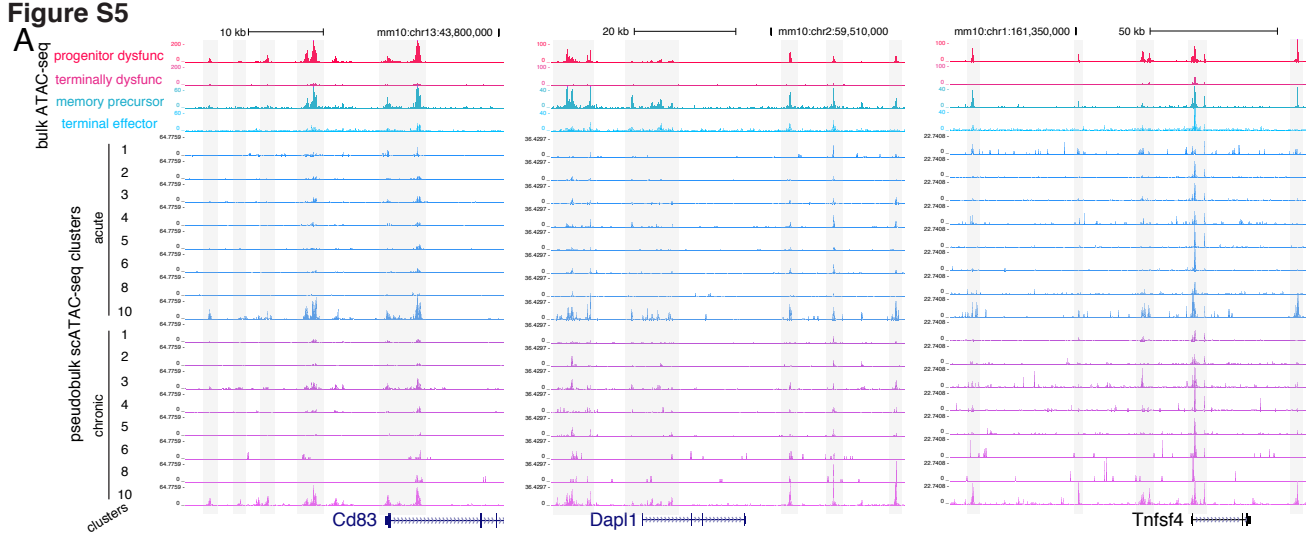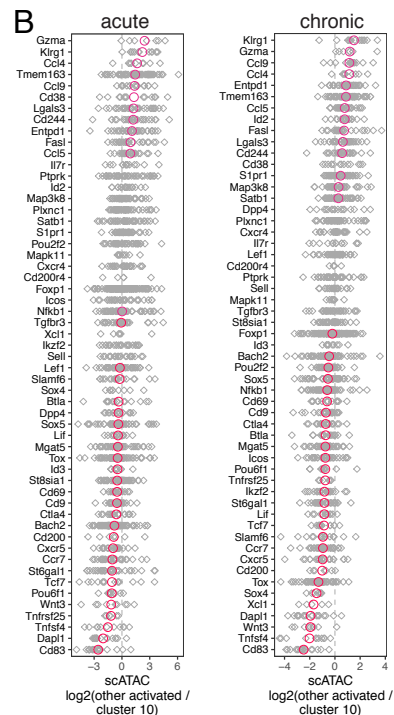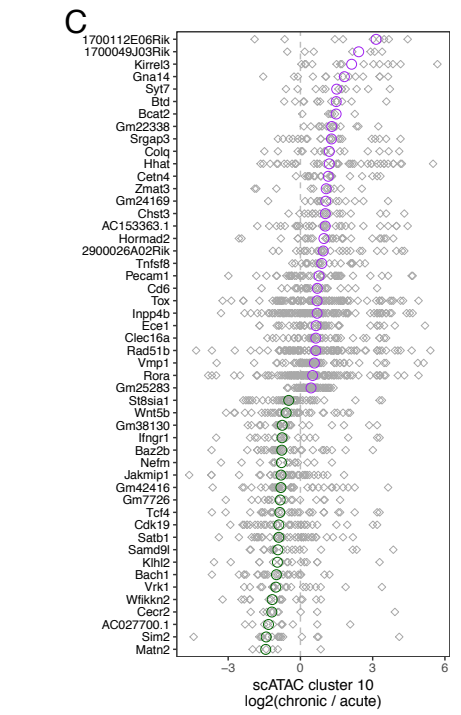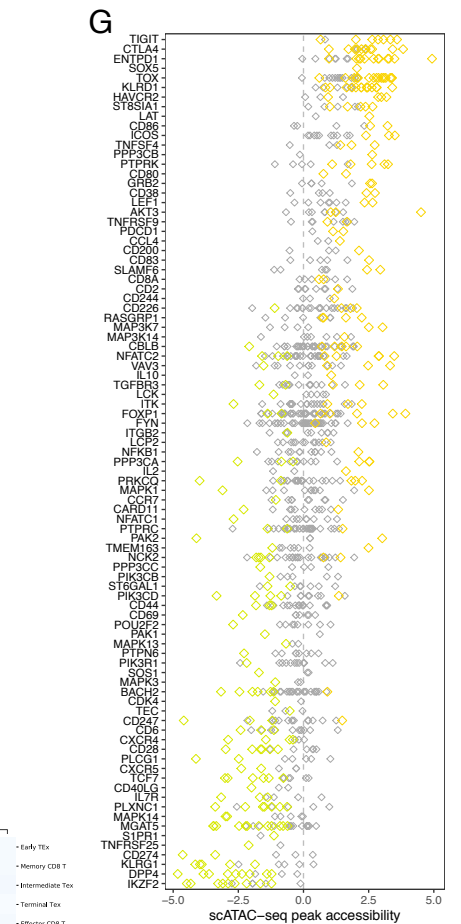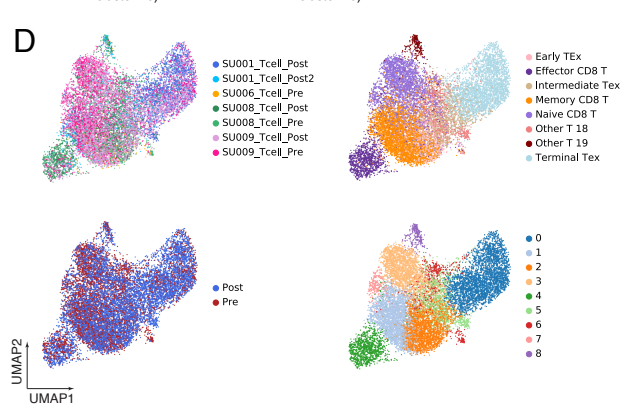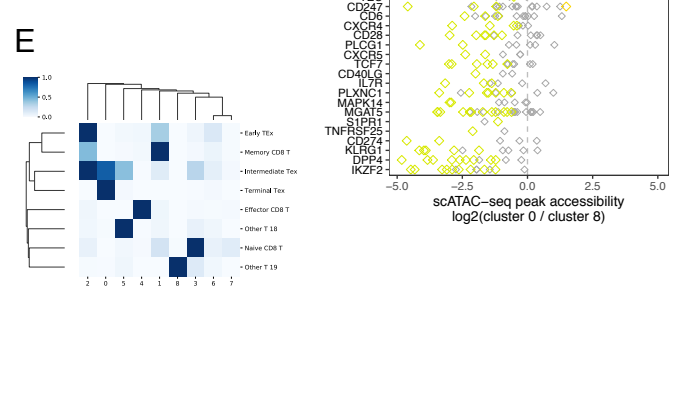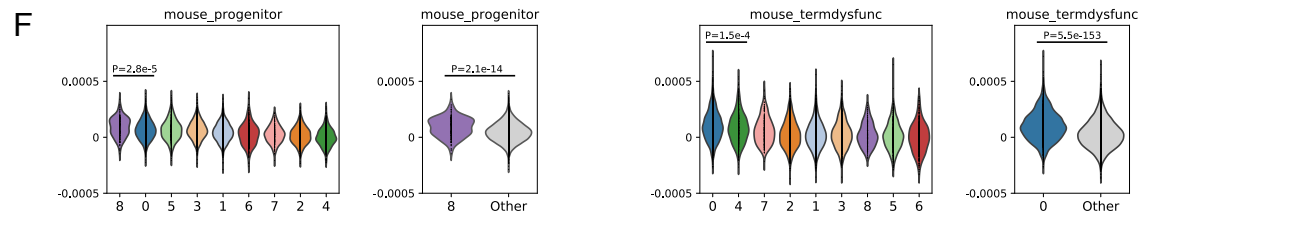

**Figure S5. scATAC-seq analysis reveals a similar population of precursor/progenitor cells in acute and chronic infection (related to Figure 3).** **A.** Genome browser tracks of ATAC-seq data for selected peaks. Bulk ATAC-seq for progenitor and terminally dysfunctional cells, and for terminal effector and memory precursor cells. Normalized aggregated single-cell ATAC-seq for cells in each cluster (for clusters 1-8, 10) in each of the two samples. For genes significantly more accessible in scATAC-seq cluster 10 as compared with other clusters. **B.** Differential accessibility of genes in cluster 10. Each panel shows normalized scATAC-seq pseudo-count (averaged over cells in each cluster in each sample) log<sub>2</sub> fold change for peak summits of significantly differentially accessible genes; mean log<sub>2</sub>FC value is highlighted (with a shade of red) for genes that were overall differentially accessible. Shown are comparisons between cells in cluster 10 and cells in clusters 1-8, separately for acute and chronic infection, for genes highlighted in Figure 1E. **C.** Same as B, but for the most significantly differentially accessible genes between cells from acute and chronic infection within cluster 10. **D.** UMAP for scATAC-seq of CD8 T cells from human cancer patients (Satpathy *et al.* 2019). Top and bottom left: patient label and treatment status of each sample. Top right: clusters identified in the original publication. Bottom right: newly identified clusters (Methods). **E.** Comparison of new clusters with those from the original publication. Shown is a fraction of cells in each of the published clusters that belong to each of the new clusters 0-8. **F.** Violin plots for scores in new human scATAC-seq clusters 0-8 of peak signatures derived from bulk ATAC-seq data in mice. Shown are comparisons of all clusters (left) and of the cluster with the highest median score against the union of all other clusters (right). The results suggest a classification of cluster 8 as progenitor dysfunctional cells, and cluster 0 as terminally dysfunctional cells. **G.** Differential accessibility of genes between new human scATAC-seq clusters 0 and 8. Shown are normalized scATAC-seq pseudocount log<sub>2</sub> fold changes for peaks of selected genes with at least one significantly differentially accessible peak (color, FDR < 0.1). Most genes show the trend similar to that in differential bulk and single-cell ATAC-seq signal between progenitor and terminally dysfunctional cells in mice, with only a few notable exceptions (e.g. KLRG1, SLAMF6, LEF1).

**Figure S6****A** Isolation of CD8 T cell subsets from LCMV Armstrong infected mice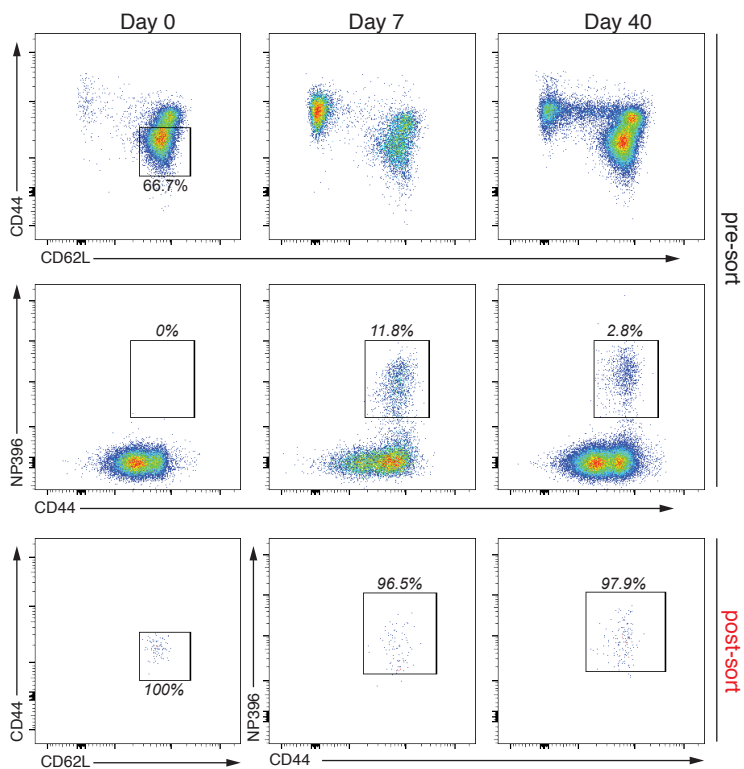**B** Isolation of CD8 T cell subsets from LCMV Cl13 infected mice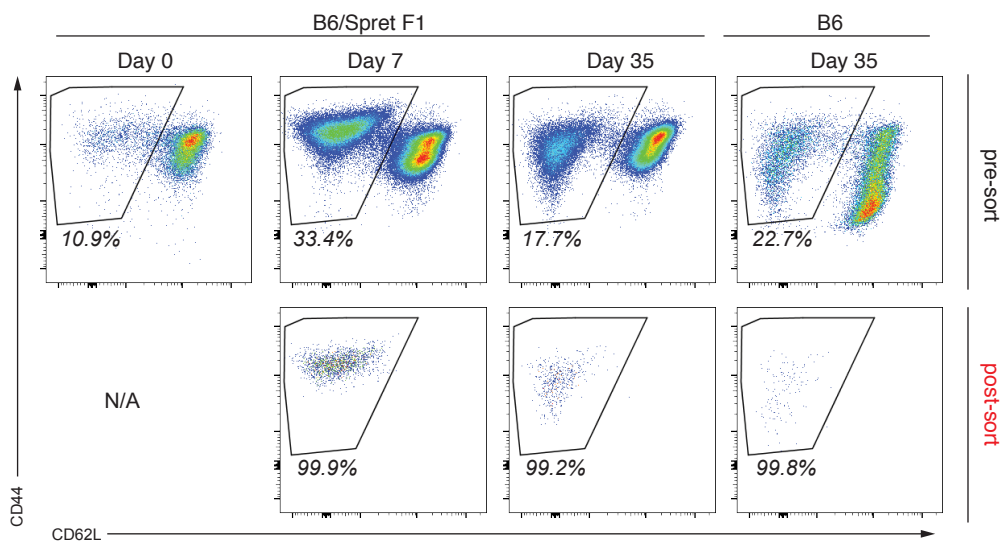**C** Gated on CD62L<sup>-</sup> cells from LCMV Cl13 infection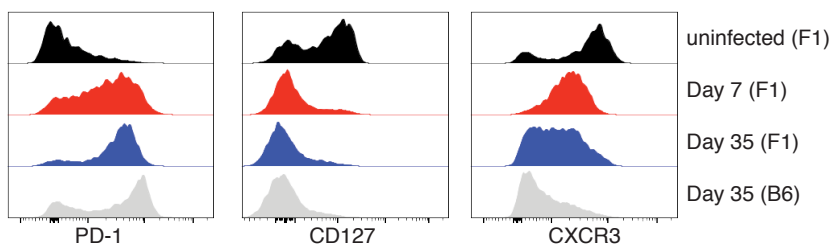

**Figure S6. Sorting for CD8 T cell subpopulations for scRNA-seq profiling (related to Figure 4). A-B.** Sorting strategy for isolating CD8 T cells responding to acute and chronic LCMV infection. **C.** Protein expression in cells isolated from chronic infection.

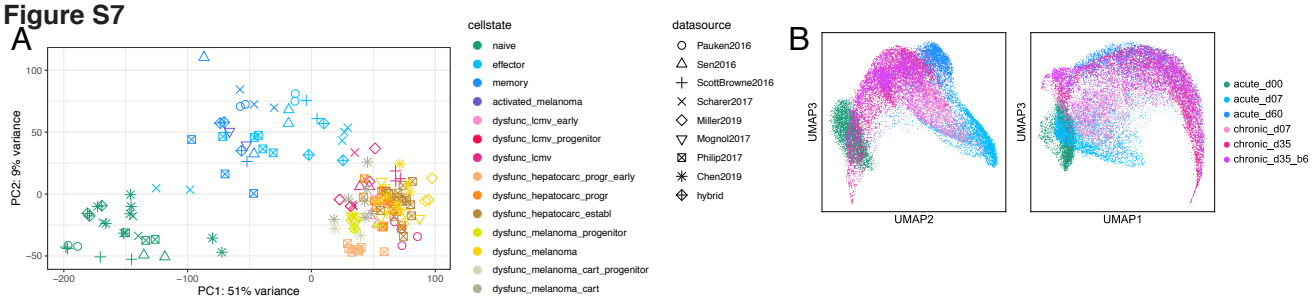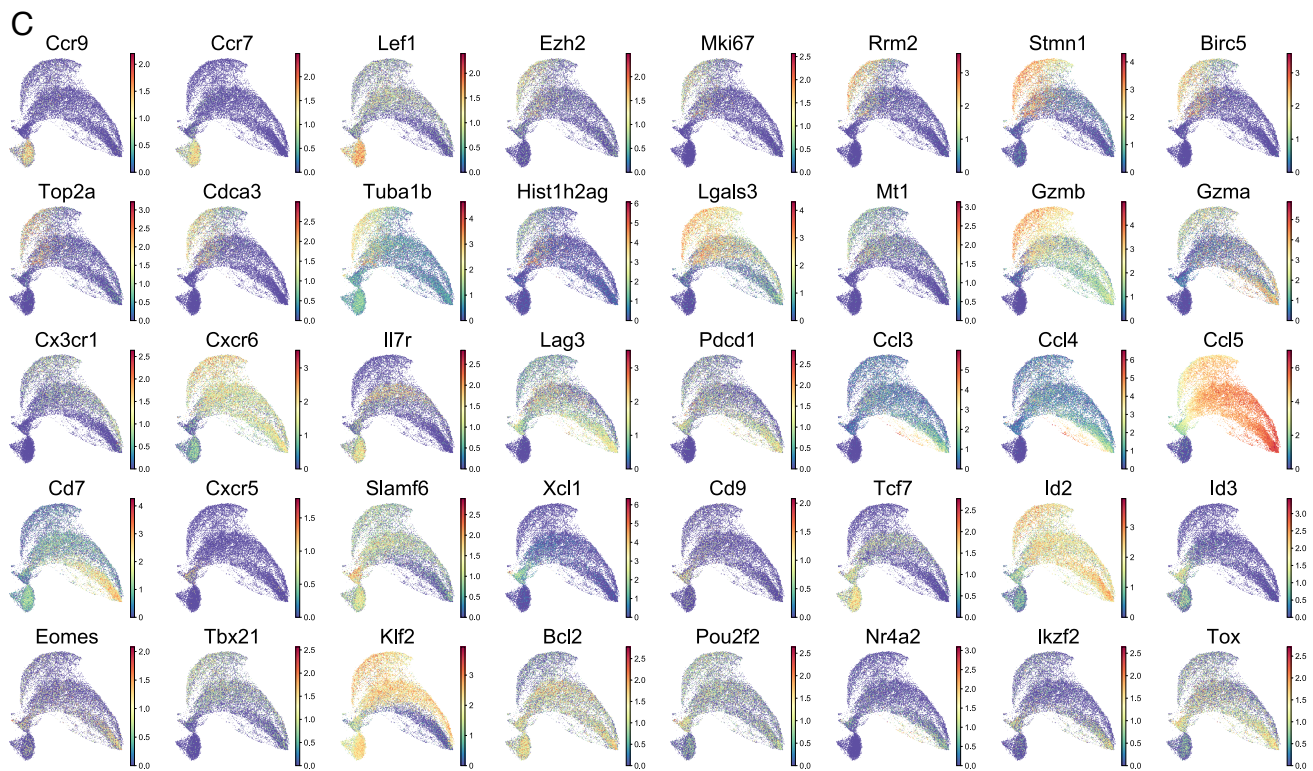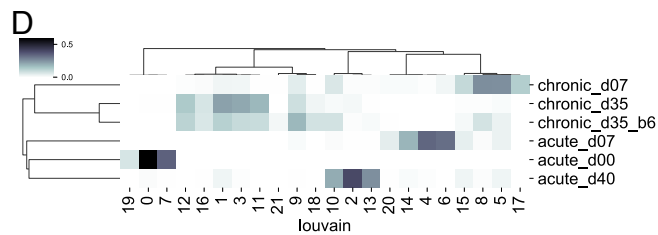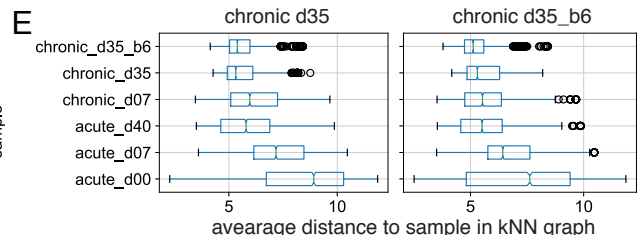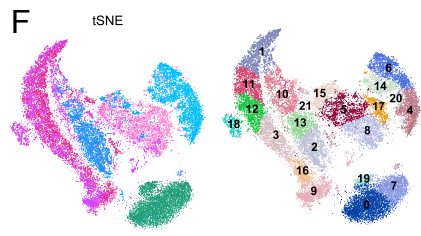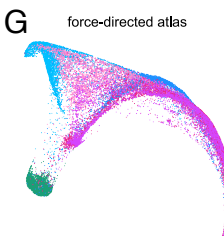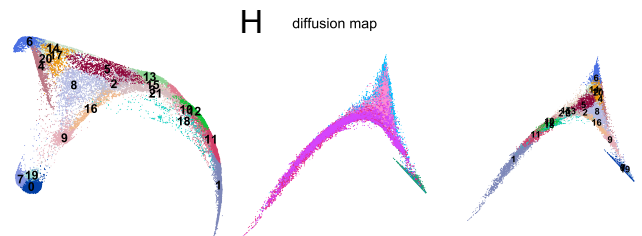

**Figure S7. Dimensionality reduction and visualization of scRNA-seq data (related to Figure 4).** **A.** Principal component analysis (PCA) of library-size normalized batch-effect corrected ATAC-seq read counts in 150bp windows around peak summits (functional cell state shown by color, data source by symbol), including samples from naïve, effector, and memory cells from hybrid F1(B6xSpret) mice. This analysis suggests that CD8 T cell functional states are similar between hybrid and B6 mice. **B.** Projections of three-dimensional UMAP representation of library-size normalized scRNA-seq data. **C.** Log-transformed gene expression (library-size normalized scRNA-seq UMI counts) on UMAP. **D.** Cluster composition of samples. Heatmap showing for each cluster what fraction of cells that cluster occupies in each sample. **E.** Boxplot of the kNN graph distances from cells in samples “chronic\_d35” (left) and “chronic\_d35\_b6” (right) to cells in other samples. For each cell C, average distance in the kNN graph from C to cells in each sample was calculated, and distribution of these values across cells C was plotted. **F-H.** Results of dimensionality reduction methods applied to normalized scRNA-seq data.

**Figure S8**

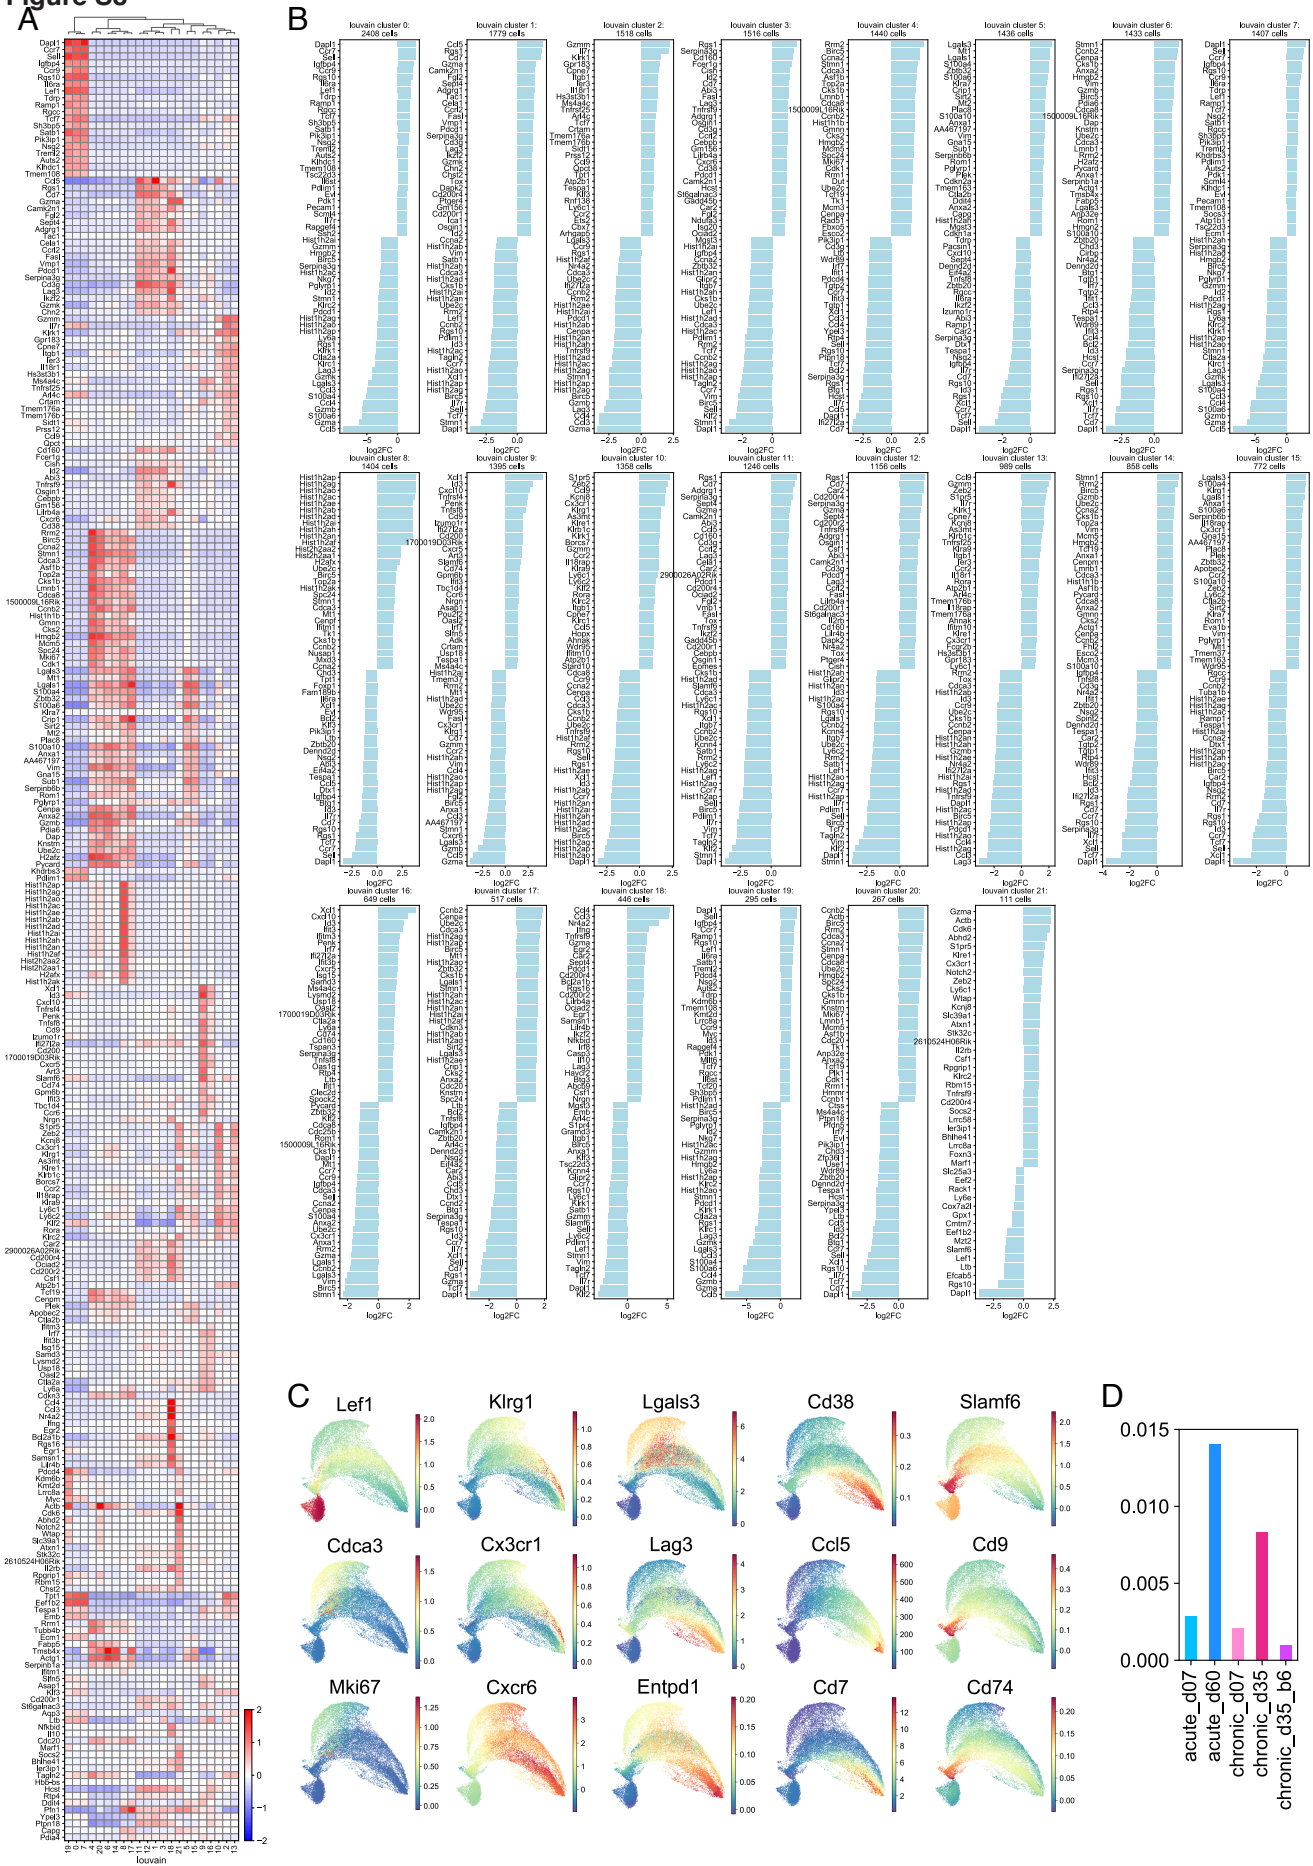

**Figure S8. Differential expression analysis of scRNA-seq data (related to Figure 4).** **A.** Average scRNA-seq gene expression (library-size normalized UMI counts, z-score row normalized) across clusters for 261 differentially expressed genes obtained as the union of three overlapping gene sets: genes significantly overexpressed in a cluster as compared with a union of all other clusters (top 20 genes per cluster,  $\log_2FC > 0.7$ , adjusted p-value  $< 0.001$ , total 224 genes), genes significantly overexpressed in a non-naïve-cell cluster as compared with a union of all other non-naïve-cell clusters (top 20 genes per cluster,  $\log_2FC > 1.0$ , adjusted p-value  $< 0.001$ , total 188 genes), genes significantly differentially expressed between a pair of non-naïve-cell clusters (top 5 genes,  $\log_2FC > 1.5$ , adjusted p-value  $< 0.001$ , total 98 genes). **B.** Barplots of scRNA-seq gene expression  $\log_2$  fold change values for top 30 genes significantly differentially over-expressed and under-expressed in each cluster. **C.** MAGIC-imputed gene expression for selected genes. **D.** Fraction of cells classified as naïve (clusters 0, 7, 19) in individual samples.



Figure S9

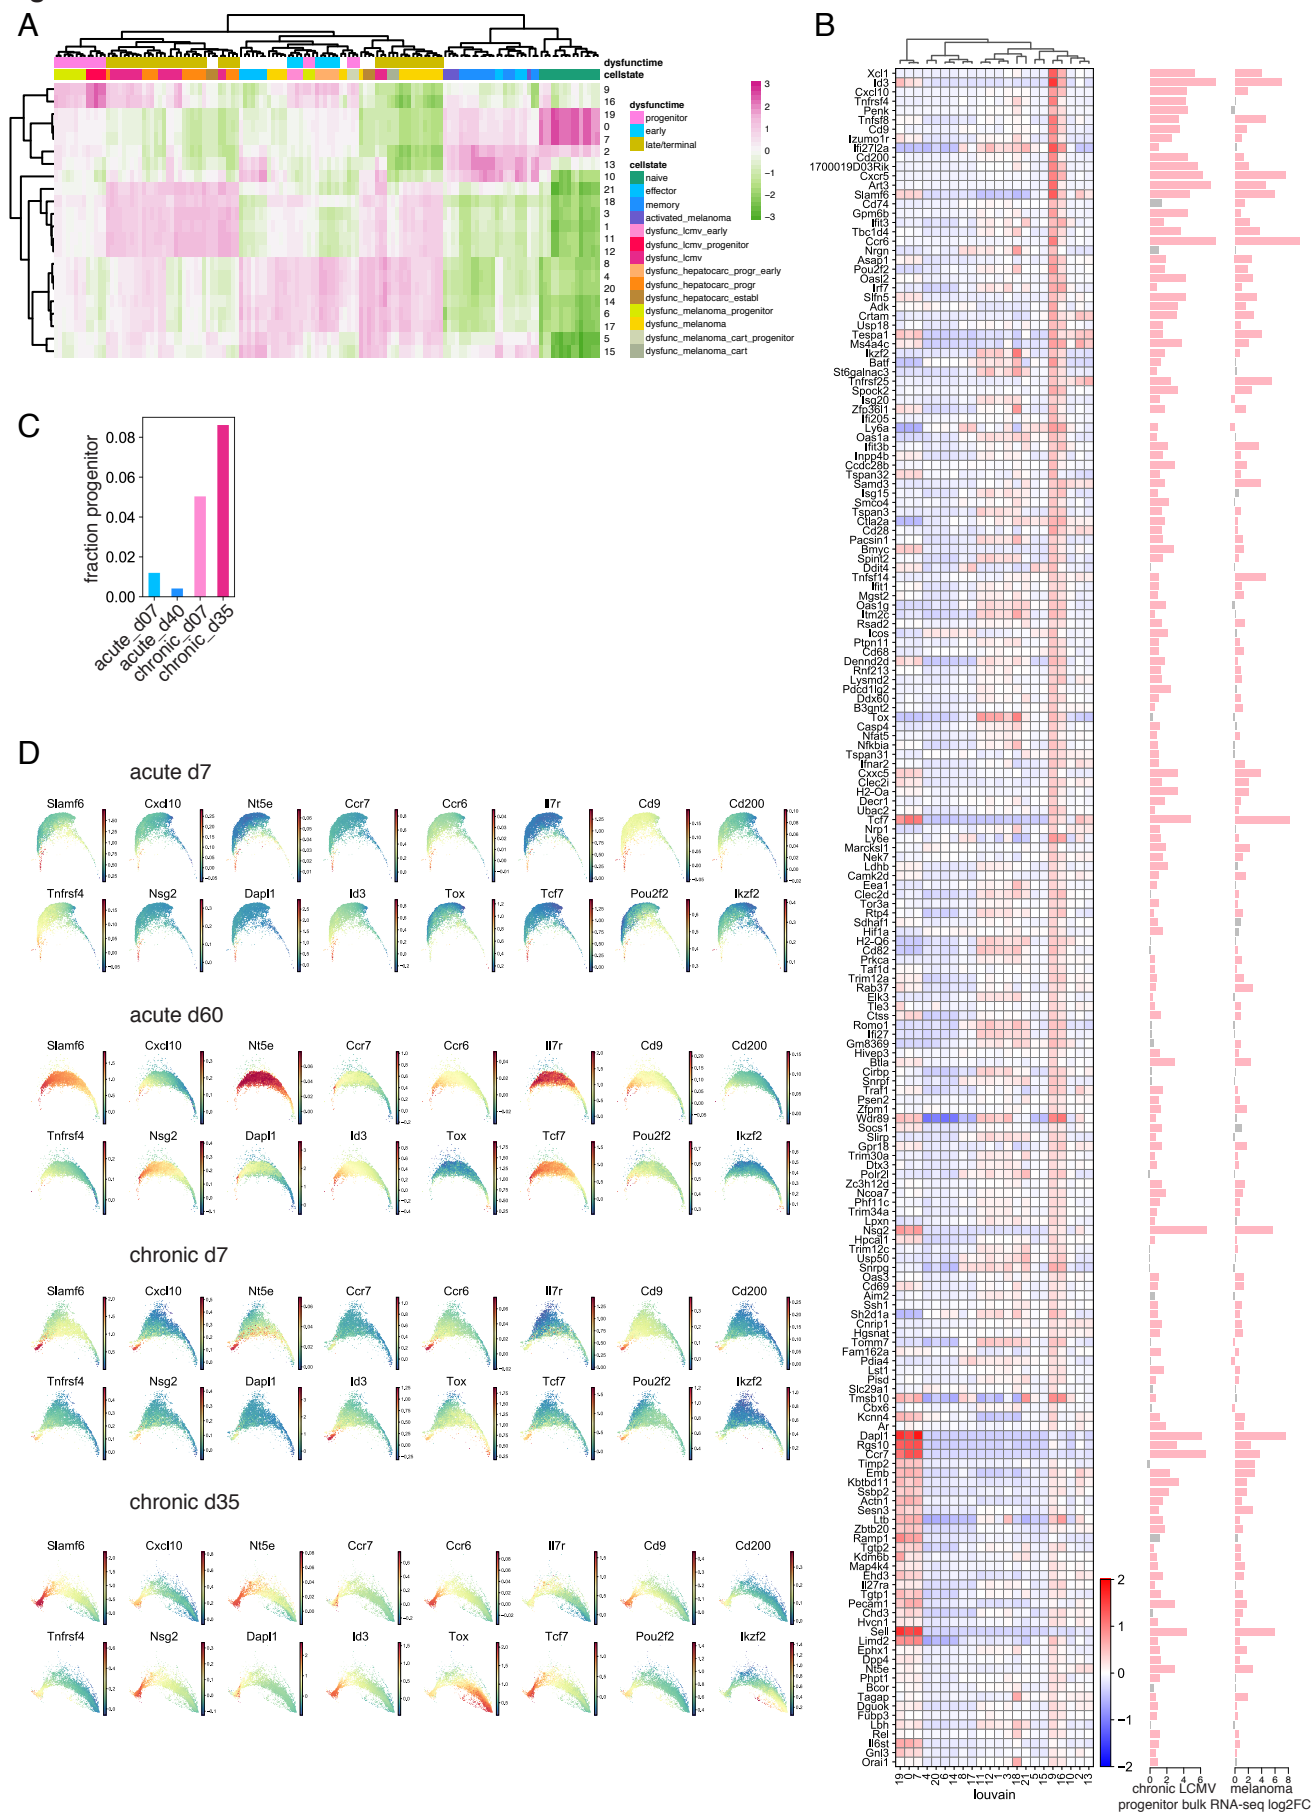

**Figure S9. scRNA-seq cluster 9 consists of precursor/progenitor cells in acute and chronic infection (related to Figure 4).** **A.** ssGSEA association of library size-normalized batch effect-corrected bulk RNA-seq data with library size-normalized scRNA-seq data averaged over cells in each cluster (z-score column normalized). Clusters 0, 7, 19 were most strongly associated with naïve cells, clusters 2, 10, 13 with memory cells, clusters 1, 3, 11, 12, 18, 21 with late and terminally dysfunctional cells, clusters 4, 5, 6, 8, 14, 15, 17, 20 with effector and early and progenitor dysfunctional cells, clusters 9 and 16 with progenitor cells and with early dysfunctional cells. **B.** Average scRNA-seq gene expression (library-size normalized UMI counts) in each cluster for genes significantly overexpressed in cluster 9 as compared with all other cells and as compared with all other cells except naïve cells (clusters 0, 7, 19). **C.** Fraction of cells that belong to cluster 9 in individual samples. **D.** MAGIC-imputed gene expression in individual samples.

Figure S10

A

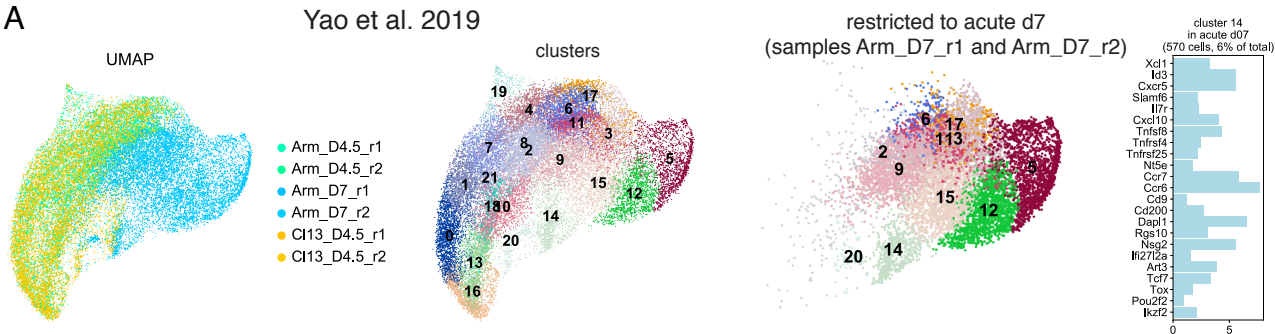

B

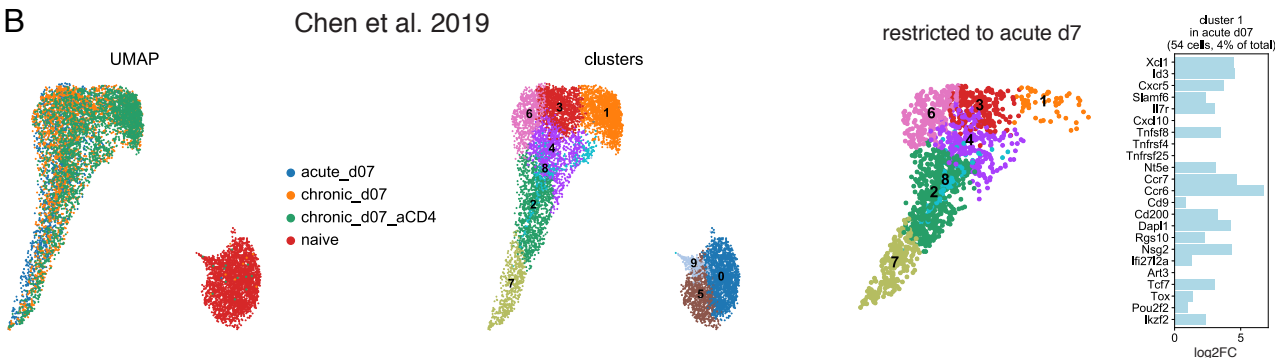

C

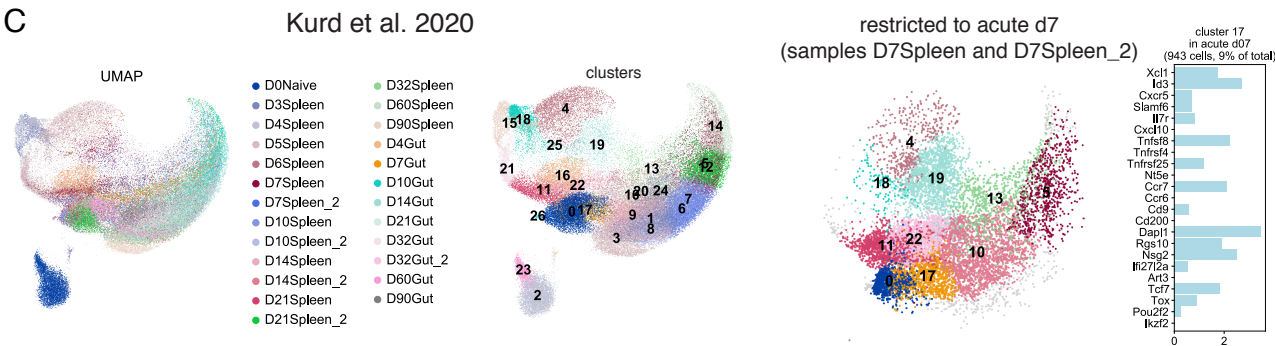

**Figure S10. Analysis of published scRNA-seq data confirms presence of progenitor-like subset at d7 in acute LCMV infection (related to Figure 4).** Enrichment of progenitor markers in a cluster of cells profiled at d7 in acute LCMV infection in three studies (Yao *et al.* 2019, Kurd *et al.* 2020, Chen *et al.* 2020) (**A-C**). Shown are significant ( $q < 0.01$ ) log<sub>2</sub> fold change values of expression in a selected cluster as compared with cells from all other clusters, as identified by diffxpy (barplot, rightmost column). Clusters occupying at least 1% of the total data set are labeled on UMAP (third column). UMAP and clustering of the whole dataset are shown (leftmost two columns).

**Figure S11**

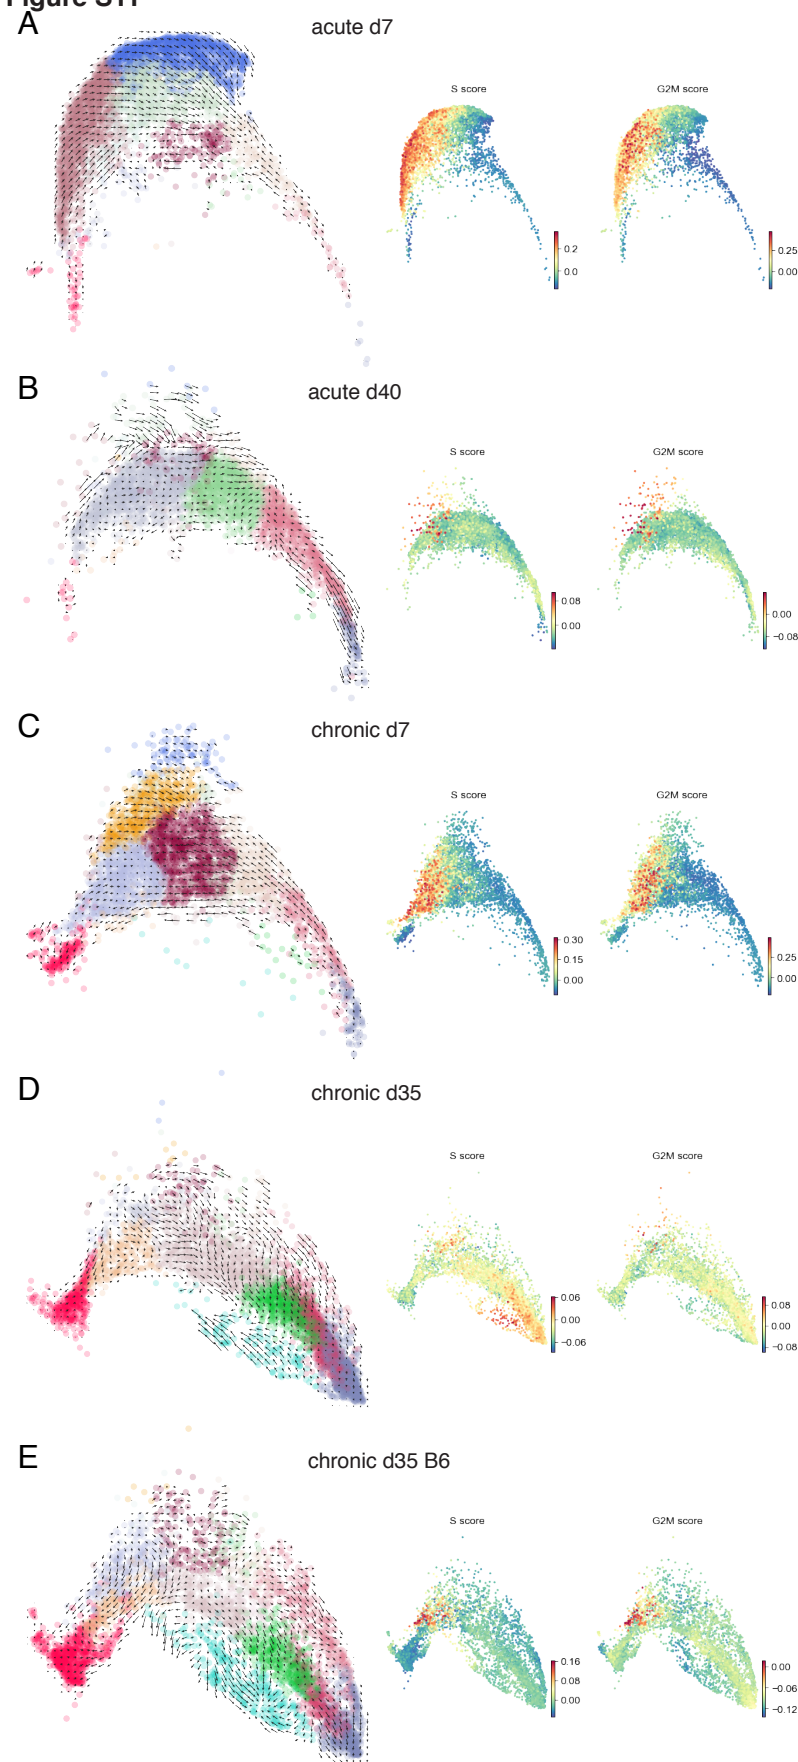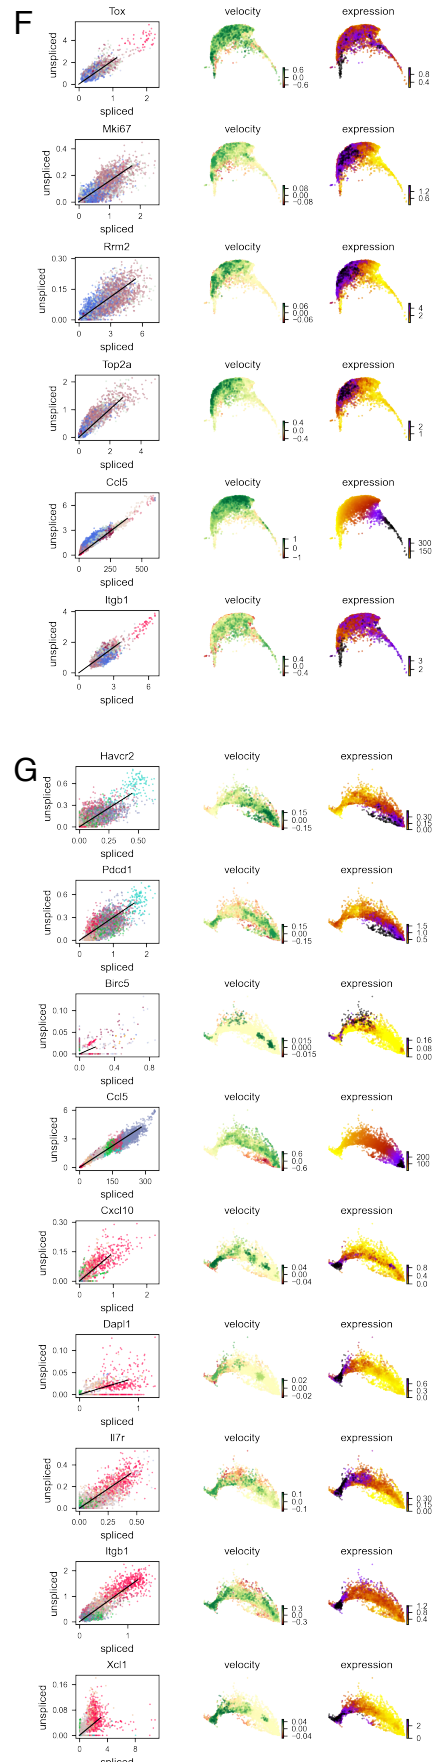

**Figure S11. RNA velocity analysis (related to Figure 4).** **A-E.** Vector maps of RNA velocities (left) and cell cycle gene signature scores (right) are shown for scRNA-seq samples “acute\_d07” (**A**), “acute\_d40” (**B**), “chronic\_d07” (**C**), “chronic\_d35” (**D**), and “chronic\_d35\_b6” (**E**). **F-G.** Phase maps of unspliced and spliced read counts (left), RNA velocities (middle), and gene expression values (averaged over nearest neighbors in the kNN graph, right) for selected genes in cells from samples “acute\_d07” (**F**) and “chronic\_d35” (**G**).

Figure S12

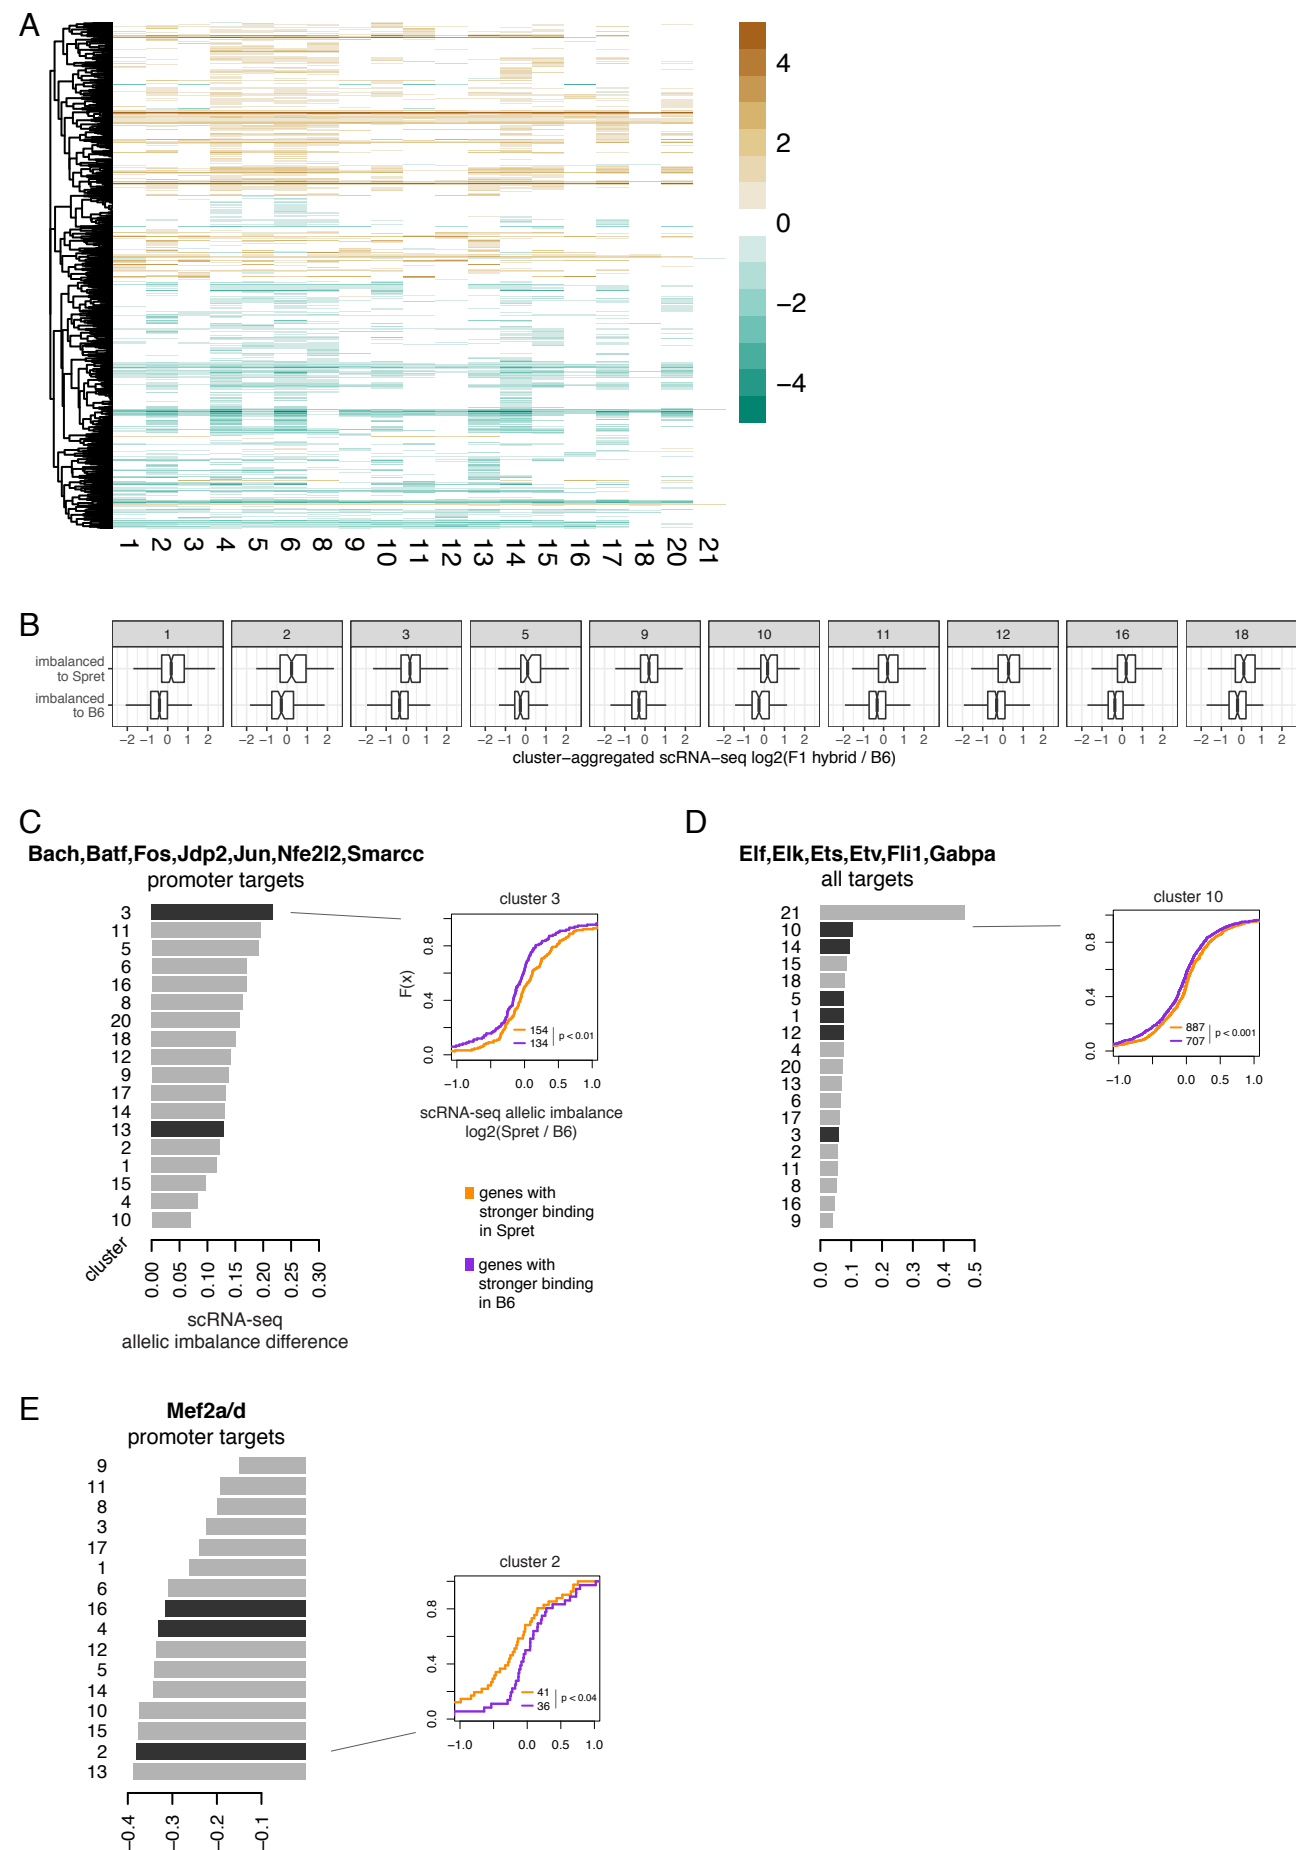

**Figure S12. Allele-specific analysis of TF binding and scRNA-seq data (related to Figure 5).** **A.** Allelic imbalance of gene expression in clusters of scRNA-seq data (color,  $p < 0.05$ , Mann-Whitney U). **B.** Boxplots of differential expression ( $\log_2$  fold change) between cells within the same scRNA-seq cluster profiled at d35 in chronic infection in B6 and in B6/Spret F1 mice, for genes with significant allelic imbalance towards B6 or Spret in B6/Spret F1 mice. Cluster number indicated on top of each boxplot. Significant difference between  $\log_2$ FC distributions ( $p < 2e-4$  for clusters 2, 5, 10, 18,  $p < 2e-16$  for all other clusters, Mann-Whitney U test) in all cases. **C-E.** Allelic specificity expression analysis of scRNA-seq data. CDF plots: allelic imbalance between B6 and Spret of library-size normalized scRNA-seq counts aggregated over cells in a selected cluster, for genes predicted to be bound more strongly in B6 or Spret using sequence motif analysis in 150bp windows around summits of their promoter peaks. Barplots: summary of the above analysis for each TF motif over all clusters; black bar indicates significant association (Kolmogorov-Smirnov  $p < 0.05$ ).



**Figure S13**
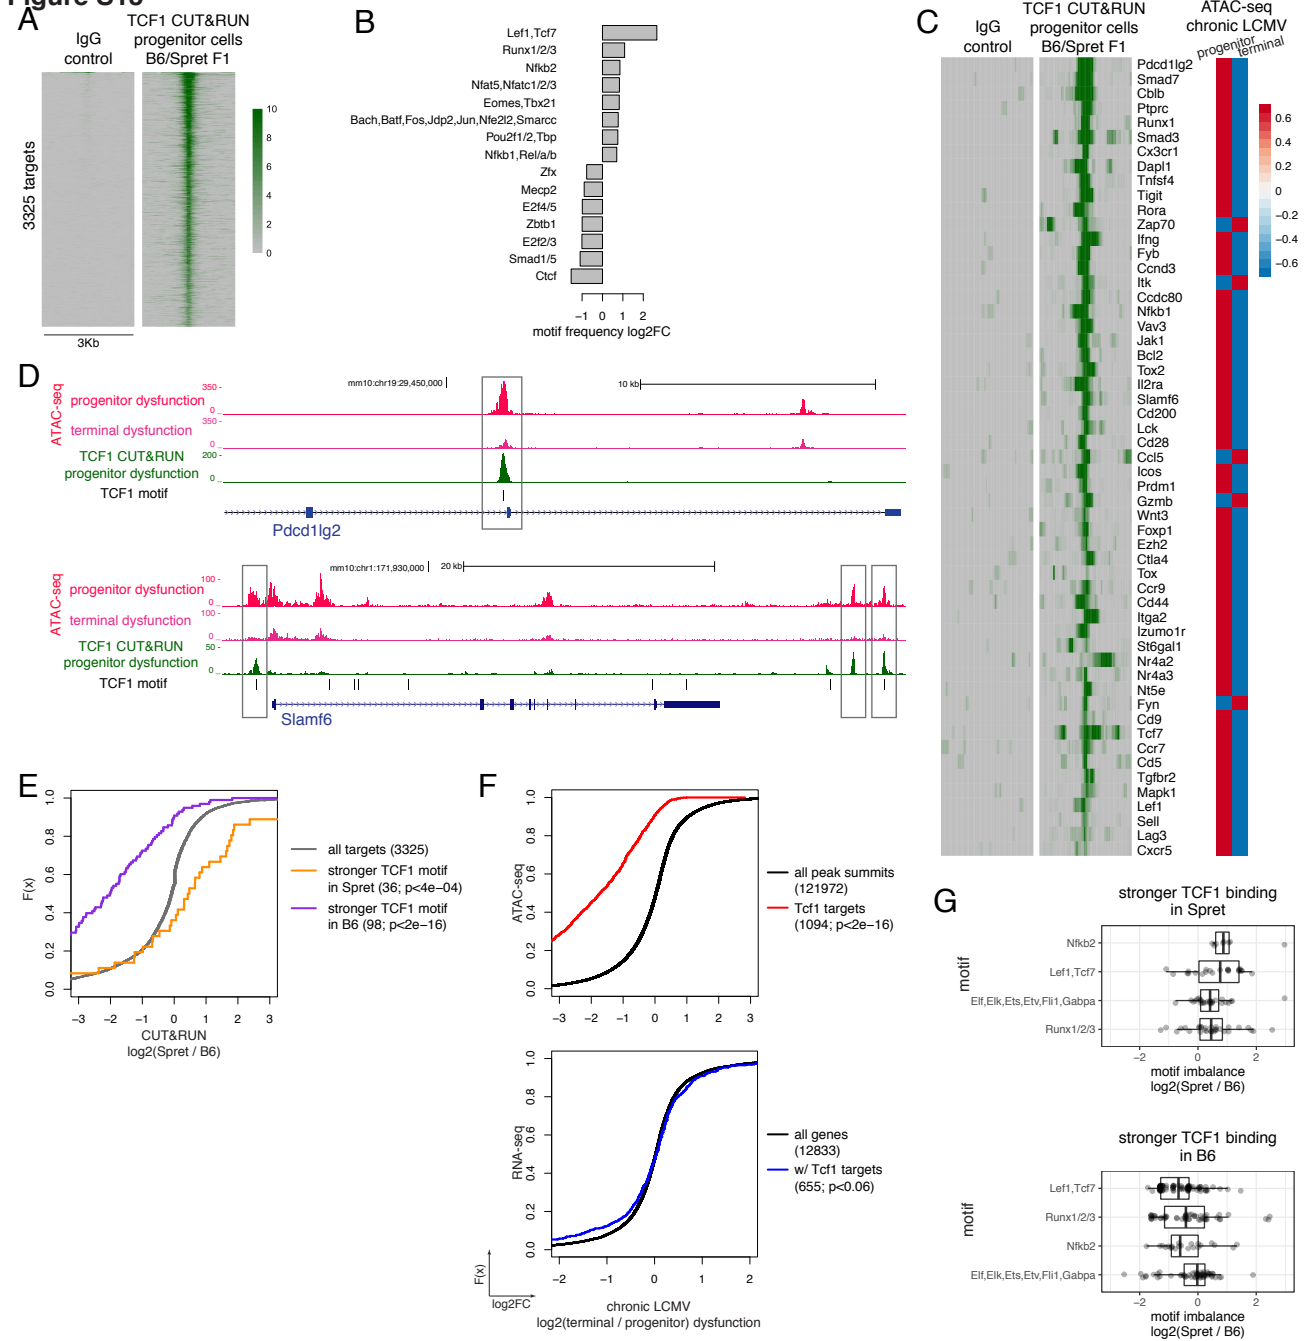

**Figure S13. CUT&RUN in progenitor dysfunctional CD8 T cells from B6/Spret F1 hybrid mice maps allele-specific TCF1 binding (related to Figure 5).** **A.** Normalized TCF1 CUT&RUN signal in TCF1-bound ATAC-seq peak summits (library-size normalized read counts in 50bp bins in 3000bp window around peak summit, ordered by total signal). **B.** Log<sub>2</sub> fold change enrichment of motif frequency in TCF1 CUT&RUN peaks relative to all ATAC-seq peak summits. **C.** Examples of TCF1 binding sites. **D.** Genome browser tracks of bulk ATAC-seq for progenitor and terminally dysfunctional cells and TCF1 CUT&RUN in progenitor dysfunctional cells for selected loci. **E.** CDF curves for allelic imbalance of CUT&RUN signal between B6 and Spret for all TCF1 targets (black) and for those predicted to be bound more strongly in B6 (purple) or Spret (orange) using sequence motif analysis. **F.** Top: CDF plots of library size-normalized batch effect-corrected ATAC-seq signal for TCF1-bound sites vs. all ATAC-seq peak summits. Bottom: CDF plots of library-size normalized batch-effect corrected RNA-seq gene expression for genes with TCF1 binding vs. all expressed genes. Shown is the comparison between progenitor and terminally dysfunctional cells in chronic LCMV infection. **G.** Imbalance of predicted TF binding using sequence motif analysis in peaks with stronger TCF1 binding in B6 or in Spret allele as identified by CUT&RUN.
